# Supplementary material for: Biochemical Characteristics and a Genome-Scale Metabolic Model of an Indian Euryhaline Cyanobacterium with High Polyglucan Content
Source: MDPI journal article supplement (doi:10.3390/metabo10050177), 2020-04-29
Supplement: s1 [file s1]

### 1. Genes present in *Synechococcus* sp. BDU 130192 genome

Analysis of the annotated genome [11] revealed that the amino acid and protein metabolism subsystems have the highest number of genes (13% each), followed by the cofactor and vitamins subsystems (12%) and the "stress metabolism" (5%). Other subsystems like membrane transport, DNA metabolism, cell division and cell cycle have relatively lower number of genes compared to *Synechococcus* sp. PCC 7002. Figure 5 shows the distribution of genes among different subsystems. We found genes involved in exopolysaccharide synthesis in the genome. Genes encoding CRISPR-associated helicases Cas1, Cas2 as well as Cas4 were also found. The transporters for branched chain amino acids and cyanate were also seen. The cytochrome-*b6* complex has 7 genes while cytochrome *c* also has 7 genes whereas *Synechococcus* sp. PCC 7002 has 4 genes for cytochrome *b6* complex and 5 for cytochrome *c* oxidase. The circadian clock proteins KaiA, KaiC as well as the circadian oscillation regulator KaiB are present in the genome.

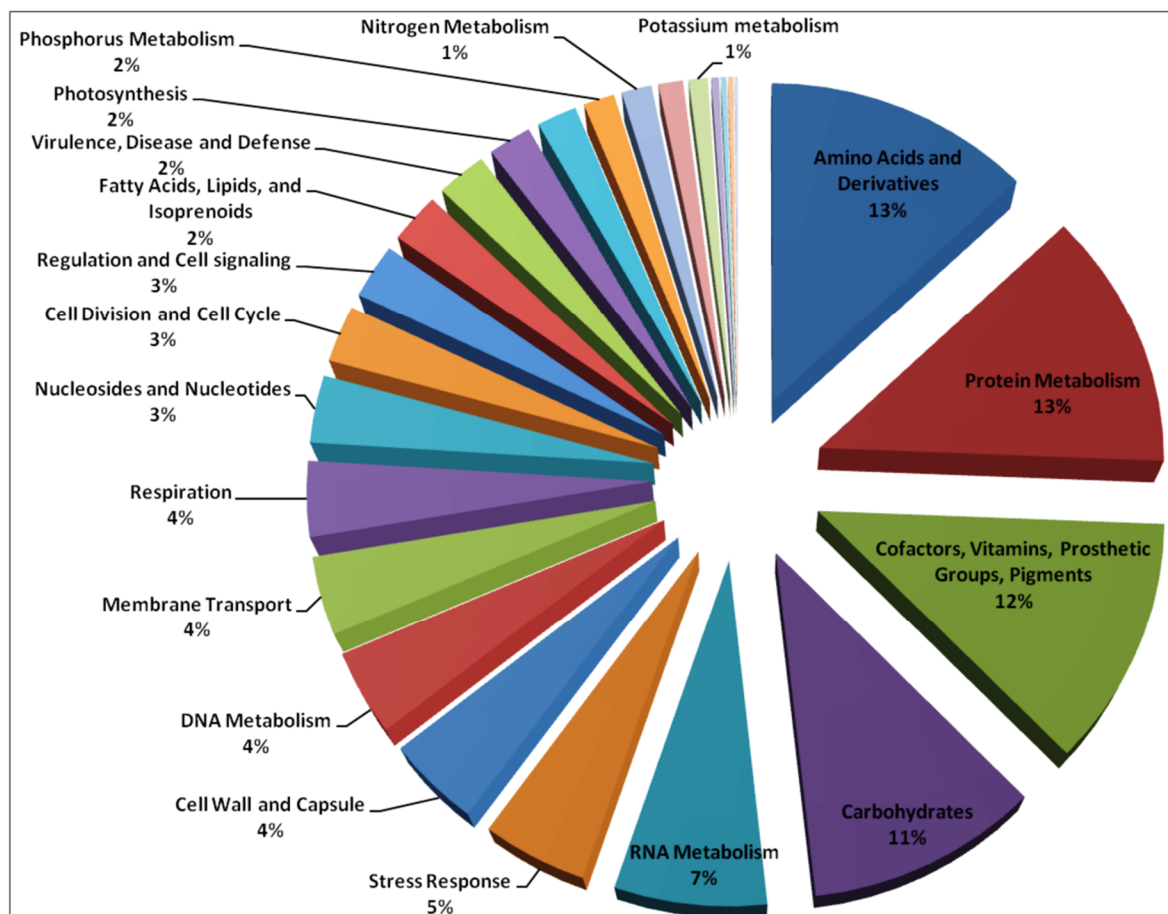

**Figure S1.** A pie-chart showing distribution of annotated genes among different subsystems.

### 2. Comparison of our model to the model of *Synechococcus* sp. PCC 7002

The model *iSyn706* is the second-largest in terms of the number of reactions compared to other publically-available models of cyanobacteria (Table 2(a)).

We performed a pathway-wise comparison of *iSyn706* model with the *iSyn708* model. As given in Table 2b, *iSyn706* has 908 reactions while *iSyn708* has 647 reactions. The *iSyn706* model contains 165 reactions while *iSyn708* contains 115 belonging to amino acid metabolism. Further analysis revealed that *iSyn706* has more reactions involving different amino acids compared to *iSyn708*. There are 31 and 6 reactions involved in phenylalanine, tyrosine and tryptophan metabolism in *iSyn706* and *iSyn708* models, respectively. Also, 27 and 12 reactions that are involved in 'cysteine and methionine

metabolism' are present in the *iSyn706* and *iSyp708* models, respectively. There are 10 and 3 reactions involved in histidine metabolism in *iSyn706* and *iSyp708* models, respectively. Only 4 reactions involved in folate metabolism are present in *iSyp708* as against 15 in the *iSyn706* model. In case of riboflavin metabolism, only 2 reactions are present in *iSyp708* against 13 in the *iSyn706* model. There are 81 and 60 reactions involving carbohydrate metabolism present in *iSyn706* and *iSyp708* models, respectively. Also, 85 and 54 reactions involving nucleotide metabolism are present in *iSyn706* and *iSyp708* models, respectively. So, the *iSyn706* model has more alternative routes for synthesis of different biomass components. However, the reactions of alanine, aspartate and glutamate metabolism are slightly more in *iSyp708* than in *iSyn706*, 28 vs. 24, respectively (Table 2(b)).

**Table S1.** Pathway-wise comparison between *iSyn706* and *iSyp708* models.

|                                                          | <i>iSyn706</i> | <i>iSyp708</i> |
|----------------------------------------------------------|----------------|----------------|
| <b>Phenylalanine, Tyrosine and Tryptophan Metabolism</b> | 31             | 6              |
| <b>Cystine and Methionine Metabolism</b>                 | 27             | 12             |
| <b>Histidine Metabolism</b>                              | 10             | 3              |
| <b>Alanine, Aspartate and Glutamate Metabolism</b>       | 24             | 28             |
| <b>Carbohydrate Metabolism</b>                           | 81             | 60             |
| <b>Nucleotide Metabolism</b>                             | 85             | 54             |
| <b>Folate Metabolism</b>                                 | 15             | 4              |
| <b>Riboflavin Metabolism</b>                             | 13             | 2              |

### 3. Photoautotrophic production of industrially-relevant compounds

**Table S2.** Table showing the maximum theoretical yields of various native and non-native products under photoautotrophic conditions as per the *iSyn706* model.

| S. No.            | Product        | Yield (mol/mol carbon) | No. of added Reactions | Added Genes                                                |
|-------------------|----------------|------------------------|------------------------|------------------------------------------------------------|
| <b>Native</b>     |                |                        |                        |                                                            |
| 1                 | Acetate        | 0.09                   | 0                      |                                                            |
| 2                 | Succinate      | 0.05                   | 0                      |                                                            |
| 3                 | Pyruvate       | 0.06                   | 0                      |                                                            |
| 4                 | Citrate        | 0.03                   | 0                      |                                                            |
| <b>Non-Native</b> |                |                        |                        |                                                            |
| 5                 | Acetone        | 0.06                   | 3                      | atoB, {atoD or atoA}, adc                                  |
| 6                 | Phenyl Alcohol | 0.02                   | 2                      | ipdC, adhC                                                 |
| 7                 | Butanol        | 0.05                   | 6                      | Thl, Hbd, crt, bcd, adhE2<br>(adhE2 catalyzes 2 reactions) |
| 8                 | Propane        | 0.05                   | 6                      | Thl, Hbd, crt, bcd, adhE2, ADO                             |
| 9                 | PHB            | 0.05                   | 3                      | phaA, phaB, phaC                                           |
| 10                | Ethanol        | 0.1                    | 1                      | adhE                                                       |

The growth rates were fixed at 80% of the wild type growth rate.

A homolog of alcohol dehydrogenase, which catalyzes the last reaction in ethanol formation, is present in the genome of *Synechococcus* sp. BDU 130192. However, no homolog for acetaldehyde

dehydrogenase was found. Therefore, ethanol synthesis requires only one additional (heterologous) reaction.
