# Supplementary material for: Biochemical Characteristics and a Genome-Scale Metabolic Model of an Indian Euryhaline Cyanobacterium with High Polyglucan Content
Source: MDPI journal article supplement (doi:10.3390/metabo10050177), 2020-04-29
Supplement: s1 [file s1]

## Primers list for RT-PCR

| Gene name    | Primer name    | Sequence              |
|--------------|----------------|-----------------------|
| <i>ppc</i>   | 130192_ref_F   | AACTCGTCGAACGGCTCAATC |
|              | 130192_ref_R   | TCTGTGTGGACGCTGTTACC  |
| <i>pgmu1</i> | 130192_pgmu1_F | ATCGCTTTGGGGTTGTGGATG |
|              | 130192_pgmu1_R | GGATTCTTCCCCGCCAATGAG |
| <i>pgmu2</i> | 130192_pgmu2_F | TTTAGAGGCAATTCAGGTGGG |
|              | 130192_pgmu2_R | AGAGCCGCTGACGGTTTTTAC |
| <i>glgC</i>  | 130192_glgC_F  | TATTCCTGATGCGGCCAAGG  |
|              | 130192_glgC_R  | CTAAAGGGTGGGATCGGCTG  |
| <i>glgA1</i> | 130192_glgA1_F | ACGGCAGTTAGGACATGACG  |
|              | 130192_glgA1_R | GTGGGCAATTTGGGGTTTCC  |
| <i>glgA2</i> | 130192_glgA2_F | CGATCCACTGCACCGTTTTTC |
|              | 130192_glgA2_R | AAGCGCATGTGGTTCGTCTAA |
